# Supplementary material for: A comparative study of ChIP-seq sequencing library preparation methods
Source: PubMed Central journal article supplement (PMC5073829; doi:10.1186/s12864-016-3135-y), 2016-10-21
Supplement: 12864_2016_3135_MOESM1_ESM.pdf [file 12864_2016_3135_MOESM1_ESM.pdf]

**Additional File 1. Supplementary Figures 1-6, Tables 1-6 and Note 1.**

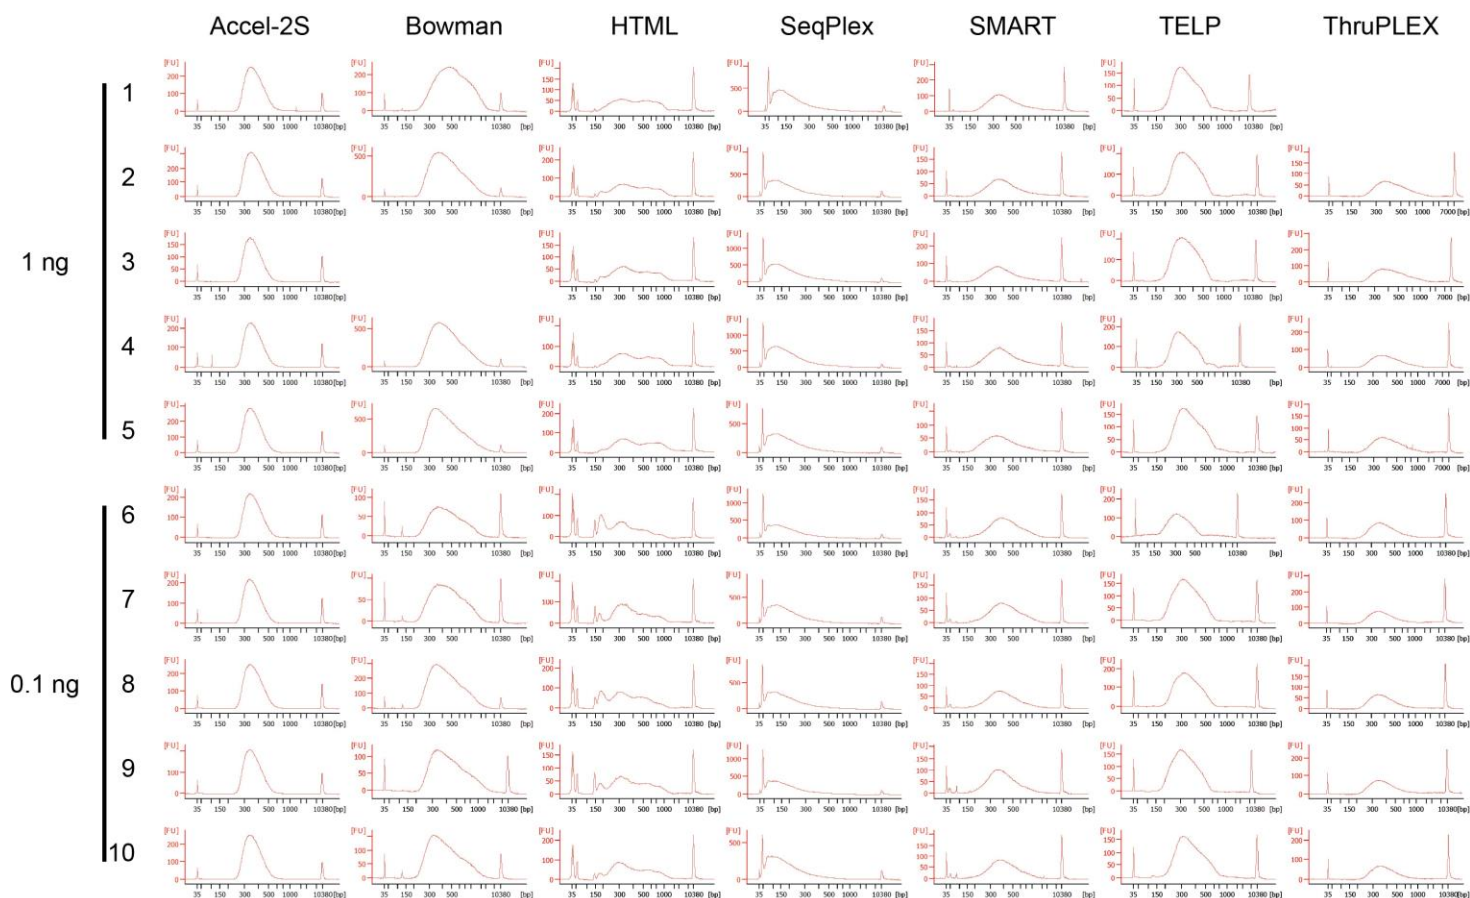

**Figure S1.** Library sizes determined by Agilent 2100 Bioanalyzer. Note that SeqPlex samples are shown following SeqPlex amplification, but prior to Illumina library adapter ligation, which was performed by a PCR-free method that attaches partially single-stranded adapters, causing aberrant migration in electrophoresis. SeqPlex amplified products shown above are therefore approximately 120 bp shorter than the final library products that were sequenced. All other libraries are shown at their full length that was sequenced.

**A**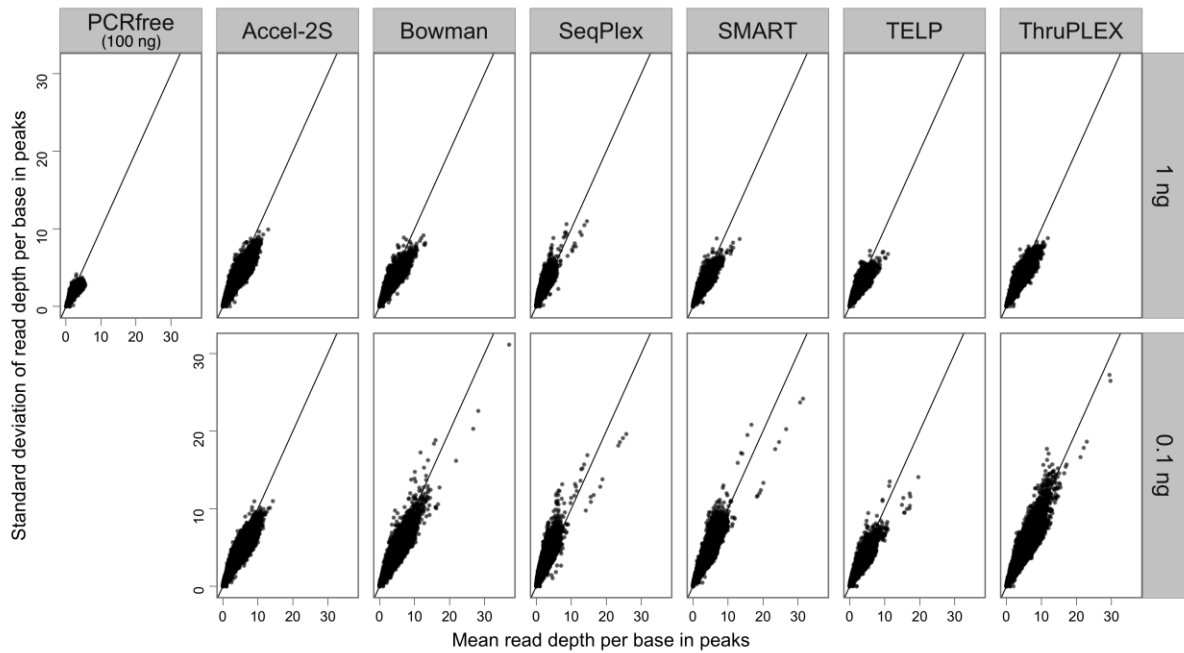**B**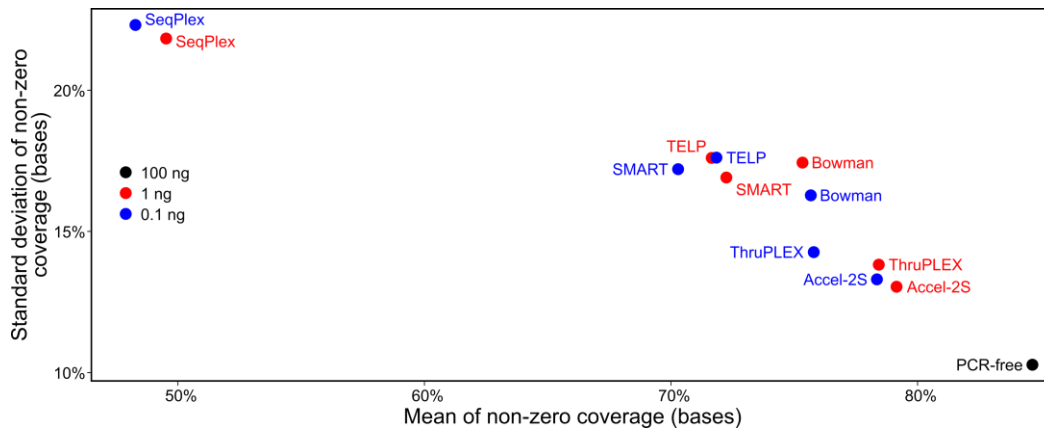

**Figure S2.** Low-input library preparation results in amplification of some sequences and loss of others. **(A)** Mean read depth is increased in amplified samples relative to the PCR-free dataset in H3K4me3 peaks, suggesting selective amplification of some sequences. Peak regions present in all three PCR-free datasets ( $n=17\ 124$  peaks called by MACS 1.4.2, see Table 2 in manuscript) were used as the reference dataset to which all other samples were compared. Within reference peak regions, mean read depth per base, and standard deviation between replicates, was calculated. Figure shows mean and SD. Data source was 5.5 million uniquely mapping non-duplicate reads per sample. **(B)** Gaps (regions of zero read coverage) in peaks. Within reference peak regions, mean coverage (bases to which one or more reads were mapped) and standard deviation from all 5 replicates within each group were calculated. Figure shows mean and SD. Highest coverage and lowest SD were seen with the PCR-free samples, and more gaps and greater variation in the amplified samples, suggesting the failure to efficiently amplify some sequences.

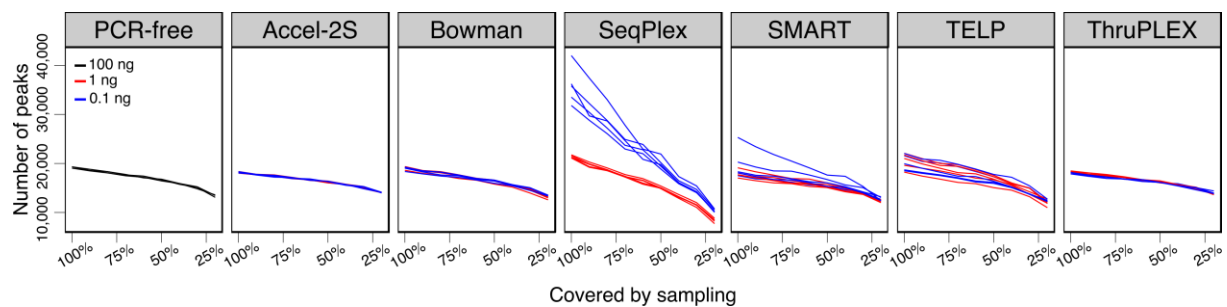

**Figure S3.** Saturation of peak calling as reads are randomly discarded. Data from MACS 1.4.2 (--diag option), starting with 5.5 million uniquely mapping reads per sample (100%).

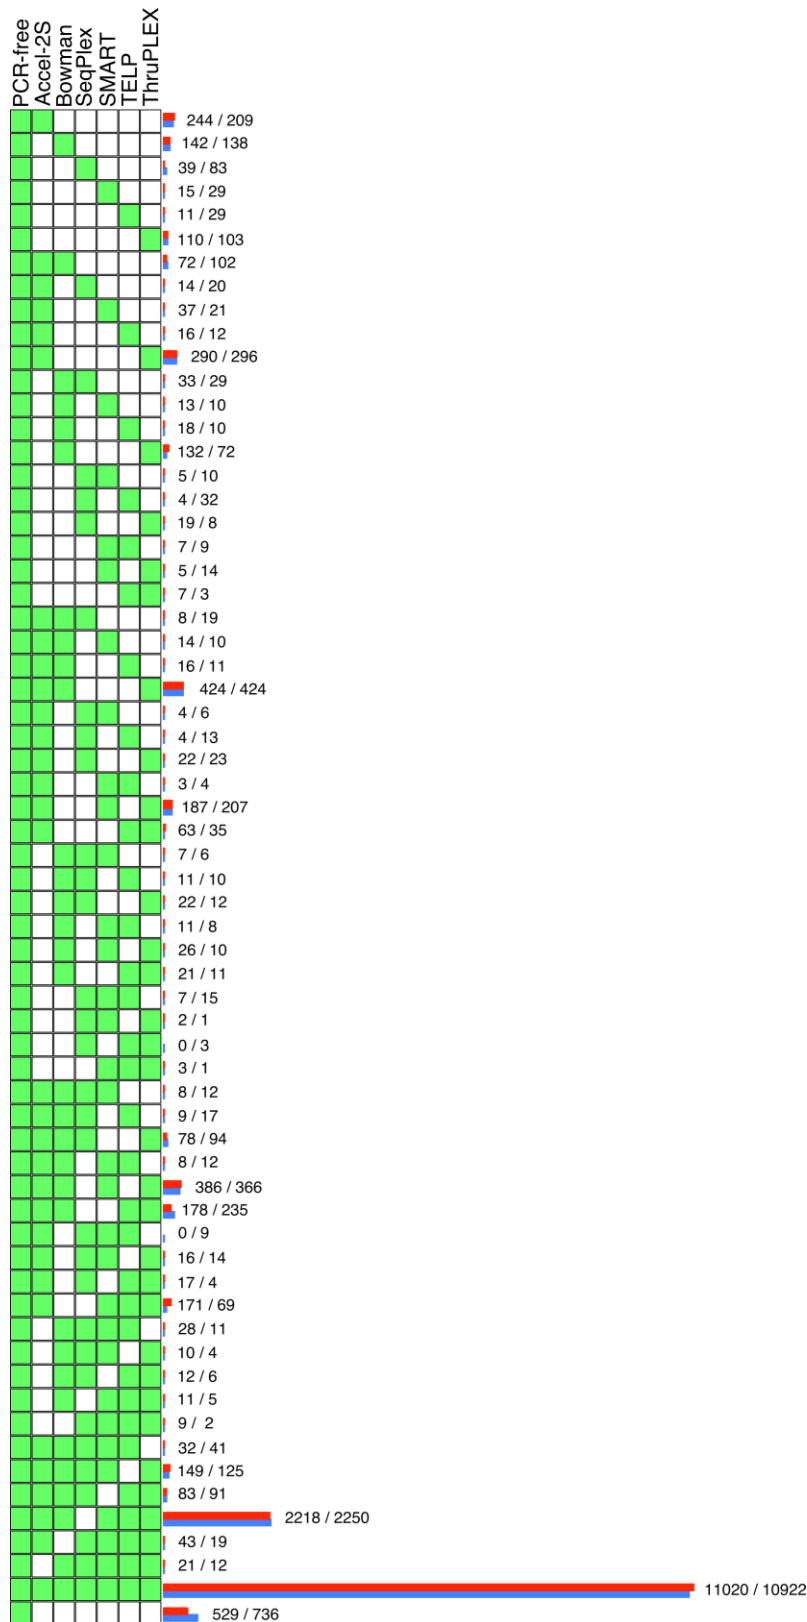

**Figure S4.** Summary of peak overlaps in all possible combinations of library types (green = present, white = absent). Peak numbers common to all 5 replicates for the 1 ng (red bars) and 0.1 ng (blue bars) low input methods, with peaks common to all three PCR-free replicates, are detailed.

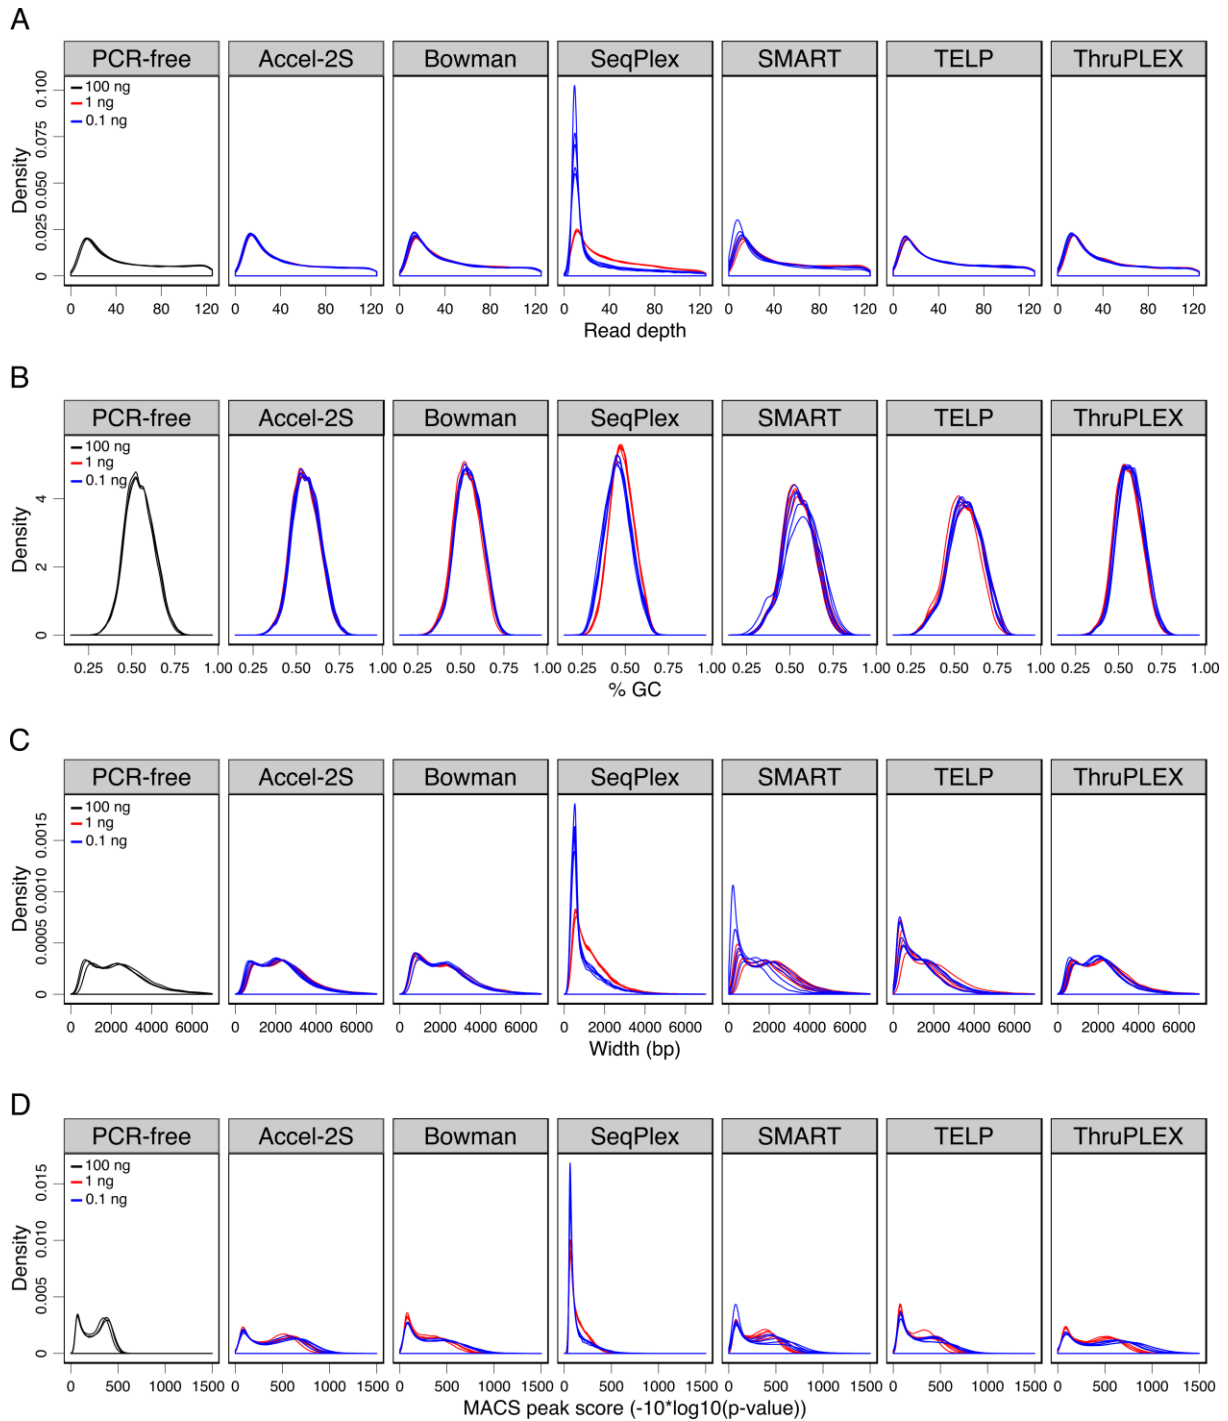

**Figure S5.** Density plots of read depth, GC content, width and MACS score within peaks. PCR-free (three replicates) method from 100 ng input is shown in black. Red and blue lines represent the five replicates used in 1 ng and 0.1 ng input across six low-input methods. **(A)** Number of reads mapping to peaks identified by MACS within individual samples using 5.5M reads. The high number of peaks with low read depth generated by SeqPlex at 0.1 ng input suggests that spurious amplification / noise was responsible for the low specificity seen in this case. **(B)** GC-content within peaks. GC-content of peak regions was similar for all methods, with two exceptions: SMART and TELP methods showed a broader range of GC content (particularly at low GC-content) than other methods, which may be related to the amplification of ssDNA not detected by other methods, although this remains to be

tested. SeqPlex showed a general shift to lower GC-content relative to other methods, more pronounced in the 0.1 ng input samples, which may indicate preferential amplification (amplification bias). **(C)** Peak width. **(D)** Peak MACS score. In both the case of peak width and MACS score, a bimodal distribution was visible, suggesting a dichotomy of broad, deep-coverage, high-confidence versus narrow, low-coverage and low-confidence peak calls. This was confirmed by further analysis (i.e. low-confidence peak calls are low-coverage narrow peaks, data not shown). Particularly regarding peak width, Accel-2S, Bowman and ThruPLEX closely match the results seen with the PCR-free reference, whilst SMART and TELP showed slightly increased numbers of low-coverage and narrow peaks and greater sample-sample variability. With respect to peak MACS scores, low-input amplification by all methods resulted in a proportion of peaks obtaining higher scores than those produced by the PCR-free method, reflecting increased read depth and a corresponding increase in peak score at sites favourably amplified by PCR. This conclusion is supported by the fraction of reads found in peaks (FRiP – see Supplementary Table 6): Accel-2S, ThruPLEX and Bowman methods present a higher percentage of mapped reads within regions called as peaks (averages 56-65%) than the PCR-free reference (average 47%), and all 0.1 ng input samples have higher FRiP values than 1 ng samples.

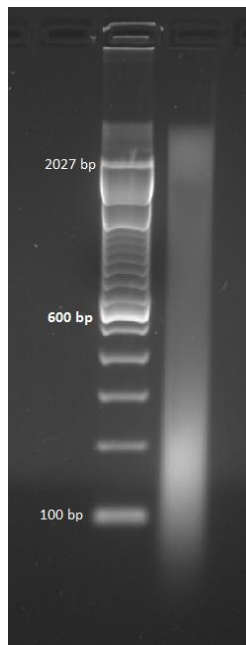

**Figure S6.** Chromatin shearing. 500 ng chromatin (pre-immunoprecipitation), following cross-link reversal, run on a 1.5 % TBE agarose gel, is shown beside 100 bp ladder.



## Note 1

Attempt to identify peaks potentially derived from ssDNA/ unique to the SeqPlex, SMART and TELP methods. When calling peaks with 5.5 M reads per sample, a number of peaks were detected in all ten replicates of the SeqPlex (n = 490), SMART (n = 283) and TELP (n = 300) methods, that were absent in any of the PCR-free replicates. Such peaks could conceivably be derived from ssDNA, which these methods can amplify, that other methods (including the PCR-free reference) would fail to detect. Alternatively, they could simply represent peaks that were detected more efficiently following amplification by the above methods relative to the PCR-free standard. In an attempt to distinguish these possibilities, we repeated peak calling on the PCR-free datasets using the maximum number of available uniquely mapping reads (88-97 million reads per sample), to maximize detection of otherwise weak H3K4me3 signals in the PCR-free dataset. Using this higher number of reads to call peaks in the PCR-free datasets: In the case of SMART and TELP, no candidate ssDNA peaks (present in all 10 replicates yet absent in the PCR-free dataset) were retained. In the case of SeqPlex, approximately 100 peaks common to all ten replicates remained, but were all found to map to genomic regions of low complexity. These observations suggested that neither SeqPlex, SMART nor TELP reproducibly detected peaks exclusively derived from ssDNA in the H3K4me3 ChIP material tested here.

| Group Name   | Sample      | Library conc. (ng/ul) | % of lane | Mean % of lane yield | Total reads passing filter | Mean # reads | SD reads | Mapped reads | Single map unique reads | Single map duplicate reads | Multiple map unique reads | Multiple map duplicate reads |
|--------------|-------------|-----------------------|-----------|----------------------|----------------------------|--------------|----------|--------------|-------------------------|----------------------------|---------------------------|------------------------------|
| Accel 1ng    | Accel-2S-1  | 5.5                   | 20.5      | 17.8                 | 45111678                   | 37804853     | 6235516  | 43742904     | 31623991                | 9150464                    | 2588891                   | 379558                       |
|              | Accel-2S-2  | 5.4                   | 21.4      |                      | 42355272                   |              |          | 41143315     | 30047992                | 8316459                    | 2438758                   | 340106                       |
|              | Accel-2S-3  | 3.4                   | 13.9      |                      | 31472814                   |              |          | 30542444     | 23121528                | 5391821                    | 1816916                   | 212179                       |
|              | Accel-2S-4  | 4.1                   | 14.7      |                      | 31431712                   |              |          | 30572400     | 23349795                | 5165548                    | 1846340                   | 210717                       |
|              | Accel-2S-5  | 4.7                   | 18.6      |                      | 38652791                   |              |          | 38090593     | 28084549                | 7434184                    | 2269257                   | 302603                       |
| Accel 100pg  | Accel-2S-6  | 4.4                   | 17.7      | 18.3                 | 35868769                   | 39556218     | 3686968  | 34666891     | 19367044                | 12955023                   | 1924126                   | 420698                       |
|              | Accel-2S-7  | 3.5                   | 19.7      |                      | 40039103                   |              |          | 38730813     | 18737073                | 17405045                   | 2033058                   | 555637                       |
|              | Accel-2S-8  | 4.2                   | 17.2      |                      | 39866020                   |              |          | 38412787     | 20308825                | 15488914                   | 2105820                   | 509228                       |
|              | Accel-2S-9  | 4.7                   | 17.5      |                      | 36745744                   |              |          | 35663670     | 19918921                | 13343081                   | 1968504                   | 433164                       |
|              | Accel-2S-10 | 5.5                   | 19.4      |                      | 45261455                   |              |          | 44473948     | 24396462                | 17060531                   | 2442177                   | 574778                       |
| Bowman 1ng   | Bowman-1    | 8.6                   | 20.5      | 19.2                 | 44344327                   | 42110111     | 7285990  | 41845936     | 24494745                | 13979892                   | 2736070                   | 635229                       |
|              | Bowman-2    | 17.9                  | 23.2      |                      | 50994774                   |              |          | 49020804     | 28936954                | 16250541                   | 3103541                   | 729768                       |
|              | Bowman-4    | 16.0                  | 17.3      |                      | 39150019                   |              |          | 37548188     | 23537699                | 11045798                   | 2449329                   | 515362                       |
|              | Bowman-5    | 19.0                  | 15.9      |                      | 33951322                   |              |          | 33286531     | 22454579                | 8244467                    | 2207660                   | 379825                       |
| Bowman 100pg | Bowman-6    | 2.6                   | 17.0      | 18.8                 | 37899374                   | 40363595     | 7086131  | 34017694     | 5606939                 | 25732675                   | 1461211                   | 1216869                      |
|              | Bowman-7    | 7.1                   | 17.3      |                      | 35060492                   |              |          | 33461180     | 11383054                | 19448168                   | 1838256                   | 791702                       |
|              | Bowman-8    | 4.2                   | 21.2      |                      | 43264701                   |              |          | 39952137     | 7883368                 | 28895263                   | 1838449                   | 1335057                      |
|              | Bowman-9    | 4.6                   | 22.1      |                      | 51352441                   |              |          | 49107583     | 15092684                | 30169948                   | 2570350                   | 1274601                      |
|              | Bowman-10   | 4.9                   | 16.3      |                      | 34240968                   |              |          | 32491391     | 9341947                 | 20529147                   | 1731513                   | 888784                       |
| HTML 1ng     | HTML-1      | 26.6                  | 22.0      | 19.6                 | 53754701                   | 47813612     | 3703738  | 48709558     | 1738574                 | 42461944                   | 1200245                   | 3308795                      |
|              | HTML-2      | 29.4                  | 19.6      |                      | 47820017                   |              |          | 37145584     | 870379                  | 32886836                   | 725578                    | 2662791                      |
|              | HTML-3      | 26.2                  | 18.2      |                      | 44433155                   |              |          | 41722931     | 643371                  | 37194541                   | 670234                    | 3214785                      |
|              | HTML-4      | 30.8                  | 19.7      |                      | 48087623                   |              |          | 40708874     | 1009294                 | 36043625                   | 824545                    | 2831410                      |
|              | HTML-5      | 31.4                  | 18.4      |                      | 44972564                   |              |          | 43625138     | 3040970                 | 36632847                   | 1457359                   | 2493962                      |

|                  |            |      |      |      |           |           |          |           |          |          |         |         |
|------------------|------------|------|------|------|-----------|-----------|----------|-----------|----------|----------|---------|---------|
| HTML 100pg       | HTML-6     | 19.8 | 17.9 | 19.6 | 40493475  | 44206645  | 3983365  | 22276757  | 178265   | 19697338 | 293367  | 2107787 |
|                  | HTML-7     | 23.0 | 19.6 |      | 44283415  |           |          | 32433677  | 105644   | 29278918 | 200930  | 2848185 |
|                  | HTML-8     | 21.4 | 18.0 |      | 40697218  |           |          | 17448619  | 370421   | 15381847 | 351317  | 1345034 |
|                  | HTML-9     | 25.6 | 20.1 |      | 45347711  |           |          | 32022362  | 200290   | 28843794 | 296876  | 2681402 |
|                  | HTML-10    | 24.4 | 22.2 |      | 50211406  |           |          | 39669348  | 215302   | 35632034 | 422688  | 3399324 |
| PCRfree (100 ng) | PCRfree-1  | 3.2  | 61.4 | 64.7 | 156079842 | 164602649 | 11749925 | 152712933 | 88285431 | 53747628 | 8266129 | 2413745 |
|                  | PCRfree-2  | 3.3  | 62.8 |      | 159721730 |           |          | 155987107 | 89960341 | 55109819 | 8427709 | 2489238 |
|                  | PCRfree-3  | 3.3  | 70.0 |      | 178006374 |           |          | 174074785 | 97424849 | 64459208 | 9272790 | 2917938 |
| SeqPlex 1ng      | SeqPlex-1  | 5.2  | 14.0 | 17.1 | 29898156  | 36327433  | 9312398  | 25440306  | 16472976 | 6236729  | 2265587 | 465014  |
|                  | SeqPlex-2  | 4.5  | 16.9 |      | 35067334  |           |          | 29881377  | 18806508 | 7941784  | 2565248 | 567837  |
|                  | SeqPlex-3  | 5.2  | 15.8 |      | 34192852  |           |          | 28992281  | 18523433 | 7398913  | 2516482 | 553453  |
|                  | SeqPlex-4  | 4.3  | 15.1 |      | 30033429  |           |          | 25605633  | 16539377 | 6354194  | 2244002 | 468060  |
|                  | SeqPlex-5  | 4.5  | 23.9 |      | 52445394  |           |          | 45302788  | 24200592 | 16330413 | 3671977 | 1099806 |
| SeqPlex 100pg    | SeqPlex-6  | 4.3  | 14.9 | 16.4 | 31464022  | 35407596  | 8634940  | 26479293  | 8428767  | 15260772 | 1915280 | 874474  |
|                  | SeqPlex-7  | 4.7  | 21.5 |      | 50161573  |           |          | 42373751  | 11451957 | 26471076 | 2834326 | 1616392 |
|                  | SeqPlex-8  | 4.7  | 14.6 |      | 32525616  |           |          | 27415028  | 9126164  | 15344903 | 2046368 | 897593  |
|                  | SeqPlex-9  | 4.4  | 13.7 |      | 27888008  |           |          | 23627833  | 9027194  | 12119527 | 1805529 | 675583  |
|                  | SeqPlex-10 | 4.8  | 17.2 |      | 34998759  |           |          | 29596458  | 8080975  | 18357591 | 2052514 | 1105378 |
| SMART 1ng        | SMART-1    | 10.1 | 19.5 | 17.7 | 40436769  | 37903325  | 3582936  | 36932174  | 27375176 | 6605304  | 2555839 | 395855  |
|                  | SMART-2    | 11.9 | 18.5 |      | 39929618  |           |          | 36311646  | 27406607 | 5987587  | 2535927 | 381525  |
|                  | SMART-3    | 9.7  | 15.9 |      | 31631176  |           |          | 28761244  | 22209384 | 4247757  | 2034762 | 269341  |
|                  | SMART-4    | 11.7 | 17.6 |      | 38660816  |           |          | 35185582  | 26922330 | 5431581  | 2466604 | 365067  |
|                  | SMART-5    | 7.3  | 17.2 |      | 38858248  |           |          | 35790094  | 26696460 | 6219610  | 2494141 | 379883  |
| SMART 100pg      | SMART-6    | 3.6  | 18.3 | 20.7 | 42610592  | 45305107  | 5040671  | 38121955  | 7198763  | 27857661 | 1681245 | 1384286 |
|                  | SMART-7    | 5.1  | 22.9 |      | 50884498  |           |          | 45697949  | 9591067  | 32462620 | 2083120 | 1561142 |
|                  | SMART-8    | 4.5  | 18.9 |      | 38446433  |           |          | 34756616  | 8351106  | 23677087 | 1656958 | 1071465 |
|                  | SMART-9    | 5.6  | 22.2 |      | 45254053  |           |          | 40977840  | 9966952  | 27793735 | 1955196 | 1261957 |

|                |             |      |      |      |          |          |          |          |          |          |         |         |
|----------------|-------------|------|------|------|----------|----------|----------|----------|----------|----------|---------|---------|
|                | SMART-10    | 4.3  | 21.3 |      | 49329959 |          |          | 44783622 | 7265798  | 34002203 | 1814361 | 1701260 |
| TELP 1ng       | TELP-1      | 2.6  | 27.6 | 26.8 | 62410689 | 56910318 | 11149304 | 58299183 | 41739486 | 12177939 | 3636511 | 745247  |
|                | TELP-2      | 3.3  | 34.5 |      | 73691822 |          |          | 68732635 | 43948088 | 19678791 | 4119351 | 986405  |
|                | TELP-3      | 2.7  | 22.6 |      | 46793490 |          |          | 43572392 | 30296064 | 10083377 | 2687509 | 505442  |
|                | TELP-4      | 2.6  | 22.6 |      | 48705230 |          |          | 44787749 | 31672060 | 9731966  | 2860374 | 523349  |
|                | TELP-5      | 2.7  | 26.7 |      | 52950359 |          |          | 49980187 | 34709768 | 11481063 | 3180370 | 608986  |
| TELP 100pg     | TELP-6      | 2.6  | 19.8 | 23.8 | 45876853 | 51995442 | 5509638  | 41528979 | 15855585 | 22536818 | 2234838 | 901738  |
|                | TELP-7      | 2.8  | 24.2 |      | 50875952 |          |          | 46656752 | 20126066 | 23034444 | 2571377 | 924865  |
|                | TELP-8      | 2.4  | 22.4 |      | 52305453 |          |          | 47727427 | 14889853 | 29287368 | 2355777 | 1194429 |
|                | TELP-9      | 2.3  | 22.5 |      | 50044732 |          |          | 45716023 | 17186109 | 25072157 | 2453500 | 1004257 |
|                | TELP-10     | 3.1  | 30.0 |      | 60874218 |          |          | 56253345 | 18779487 | 33198583 | 2888992 | 1386283 |
| ThruPLEX 1ng   | ThruPLEX-2  | 14.1 | 19.6 | 18.7 | 44220953 | 40280965 | 3309543  | 42818851 | 28425846 | 11249638 | 2700897 | 442470  |
|                | ThruPLEX-3  | 12.1 | 17.0 |      | 36268935 |          |          | 35226411 | 24398740 | 8213153  | 2288050 | 326468  |
|                | ThruPLEX-4  | 10.2 | 19.1 |      | 39530622 |          |          | 38526658 | 25375302 | 10317384 | 2438547 | 395425  |
|                | ThruPLEX-5  | 12.4 | 19.0 |      | 41103350 |          |          | 40517279 | 27310398 | 10212864 | 2590173 | 403844  |
| ThruPLEX 100pg | ThruPLEX-6  | 4.5  | 15.7 | 18.4 | 36286893 | 40215283 | 6614980  | 35191492 | 6006229  | 26627366 | 1396369 | 1161528 |
|                | ThruPLEX-7  | 10.5 | 23.9 |      | 36489833 |          |          | 35093845 | 10341919 | 22142379 | 1757414 | 852133  |
|                | ThruPLEX-8  | 10.7 | 14.8 |      | 50278253 |          |          | 48777537 | 10423081 | 34746970 | 2146818 | 1460668 |
|                | ThruPLEX-9  | 9.7  | 19.6 |      | 34452468 |          |          | 33444970 | 10172001 | 20785390 | 1684773 | 802806  |
|                | ThruPLEX-10 | 5.1  | 17.8 |      | 43568966 |          |          | 42790079 | 6247989  | 33412904 | 1589222 | 1539964 |

**Table S1.** Individual library and sequencing yields.

| Sample     | QC Stamp | denQC<br>(2.5%) s50 | simQC<br>(2.5%)<br>s90/s50 | denQC<br>(5%) s50 | simQC (5%)<br>s90/s50 | denQC<br>(10%) s50 | simQC<br>(10%)<br>s90/s50 |
|------------|----------|---------------------|----------------------------|-------------------|-----------------------|--------------------|---------------------------|
| Accel2S-1  | AAB      | 0.405366            | 4.260956                   | 1.227305          | 2.03606               | 2.125244           | 1.378158                  |
| Accel2S-2  | AAB      | 0.409938            | 4.219871                   | 1.219755          | 2.046993              | 2.126106           | 1.377169                  |
| Accel2S-3  | AAB      | 0.429274            | 4.311664                   | 1.260052          | 2.080289              | 2.187176           | 1.396675                  |
| Accel2S-4  | AAB      | 0.42284             | 4.141007                   | 1.24667           | 2.017802              | 2.142873           | 1.374477                  |
| Accel2S-5  | AAB      | 0.417131            | 4.153028                   | 1.235474          | 2.019877              | 2.120703           | 1.37989                   |
| Accel2S-6  | AAB      | 0.395051            | 4.811642                   | 1.278468          | 2.154829              | 2.310676           | 1.391279                  |
| Accel2S-7  | AAB      | 0.40638             | 4.8385                     | 1.317869          | 2.256349              | 2.42347            | 1.428433                  |
| Accel2S-8  | AAB      | 0.385775            | 4.864932                   | 1.252879          | 2.279556              | 2.303504           | 1.441956                  |
| Accel2S-9  | AAB      | 0.397739            | 4.750966                   | 1.267804          | 2.15291               | 2.296203           | 1.39092                   |
| Accel2S-10 | AAB      | 0.394923            | 4.745306                   | 1.252061          | 2.151448              | 2.248587           | 1.39885                   |
|            |          |                     |                            |                   |                       |                    |                           |
| Bowman-1   | ABB      | 0.246412            | 6.539536                   | 0.907523          | 2.670973              | 1.898535           | 1.533538                  |
| Bowman-2   | AAB      | 0.26763             | 6.148778                   | 0.960884          | 2.534696              | 1.931091           | 1.499517                  |
| Bowman-4   | AAB      | 0.265841            | 6.138008                   | 0.952801          | 2.544163              | 1.922344           | 1.506257                  |
| Bowman-5   | AAB      | 0.281105            | 5.92351                    | 0.98368           | 2.498188              | 1.960539           | 1.494372                  |
| Bowman-6   | BBB      | 0.171698            | 10.416718                  | 0.855802          | 3.750126              | 2.39845            | 1.757626                  |
| Bowman-7   | ABB      | 0.224356            | 7.573543                   | 0.95021           | 3.117364              | 2.208037           | 1.600598                  |
| Bowman-8   | BBB      | 0.189049            | 9.077225                   | 0.886979          | 3.421181              | 2.306735           | 1.7191                    |
| Bowman-9   | ABB      | 0.248233            | 6.816912                   | 0.980974          | 2.986804              | 2.176437           | 1.592384                  |
| Bowman-10  | BBB      | 0.199061            | 8.087209                   | 0.871369          | 3.267864              | 2.151118           | 1.73208                   |
|            |          |                     |                            |                   |                       |                    |                           |
| HTML-1     | CCC      | 0.054983            | 26.041754                  | 0.345278          | 8.390292              | 1.532629           | 2.671959                  |
| HTML-2     | CCC      | 0.037265            | 36.69231                   | 0.245804          | 11.563412             | 1.212538           | 3.304374                  |
| HTML-3     | DDC      | 0.030508            | 39.680553                  | 0.188347          | 13.194601             | 0.983259           | 3.559793                  |

|           |     |          |           |          |           |          |          |
|-----------|-----|----------|-----------|----------|-----------|----------|----------|
| HTML-4    | CCC | 0.041189 | 33.232559 | 0.258147 | 10.891157 | 1.271578 | 3.135844 |
| HTML-5    | BBC | 0.084645 | 18.711485 | 0.508186 | 6.034525  | 1.922177 | 2.198224 |
| HTML-6    | DDD | 0.016293 | 27.85     | 0.078615 | 13.336788 | 0.397558 | 4        |
| HTML-7    | CDD | 0.025018 | 18.333332 | 0.104242 | 9.160001  | 0.423522 | 3.35865  |
| HTML-8    | DDD | 0.018702 | 41.533333 | 0.092885 | 18.416107 | 0.561672 | 4.35849  |
| HTML-9    | DDD | 0.019079 | 29.31111  | 0.093273 | 13.645455 | 0.456191 | 4.060409 |
| HTML-10   | DDD | 0.023331 | 28.796875 | 0.115195 | 12.848101 | 0.532231 | 4.019863 |
|           |     |          |           |          |           |          |          |
| PCRfree-1 | AAB | 0.379023 | 4.513313  | 1.180856 | 2.113914  | 2.089914 | 1.408961 |
| PCRfree-2 | AAB | 0.384898 | 4.457674  | 1.177873 | 2.133056  | 2.096019 | 1.410582 |
| PCRfree-3 | AAB | 0.378288 | 4.525338  | 1.180815 | 2.111303  | 2.093151 | 1.405868 |
|           |     |          |           |          |           |          |          |
| SMRT-1    | ABB | 0.233723 | 6.335361  | 0.85076  | 2.561771  | 1.712783 | 1.508027 |
| SMRT-2    | ABB | 0.226987 | 6.570771  | 0.840193 | 2.613346  | 1.717932 | 1.519981 |
| SMRT-3    | ABB | 0.232949 | 6.32417   | 0.844182 | 2.558635  | 1.70665  | 1.502211 |
| SMRT-4    | ABB | 0.226007 | 6.613716  | 0.834391 | 2.631577  | 1.711541 | 1.525393 |
| SMRT-5    | ABB | 0.225203 | 6.45785   | 0.8318   | 2.573584  | 1.68282  | 1.506028 |
| SMRT-6    | BBB | 0.106341 | 11.758329 | 0.565312 | 4.08439   | 1.692988 | 1.824869 |
| SMRT-7    | BBB | 0.135433 | 9.669978  | 0.657021 | 3.593417  | 1.773075 | 1.751294 |
| SMRT-8    | BBB | 0.134374 | 9.998158  | 0.675724 | 3.559475  | 1.820379 | 1.727811 |
| SMRT-9    | BBB | 0.147161 | 9.111913  | 0.701044 | 3.409955  | 1.824947 | 1.716249 |
| SMRT-10   | BBB | 0.119916 | 11.106431 | 0.617195 | 3.953251  | 1.799987 | 1.792505 |
|           |     |          |           |          |           |          |          |
| SeqPlex-1 | BBC | 0.107335 | 16.572895 | 0.518396 | 6.132714  | 1.646627 | 2.333242 |
| SeqPlex-2 | BBC | 0.109376 | 15.924675 | 0.523603 | 5.911224  | 1.645902 | 2.271954 |
| SeqPlex-3 | BBC | 0.107461 | 16.247557 | 0.519643 | 5.977759  | 1.637573 | 2.292029 |

|            |     |          |           |          |          |          |          |
|------------|-----|----------|-----------|----------|----------|----------|----------|
| SeqPlex-4  | BBC | 0.111763 | 15.824541 | 0.532633 | 5.907787 | 1.665495 | 2.285106 |
| SeqPlex-5  | BBC | 0.106635 | 16.888292 | 0.517948 | 6.189856 | 1.660914 | 2.330759 |
| SeqPlex-6  | BCC | 0.093109 | 19.039728 | 0.489588 | 8.054779 | 1.943962 | 3.02234  |
| SeqPlex-7  | BCC | 0.095427 | 18.66375  | 0.493959 | 8.09508  | 1.952787 | 3.046642 |
| SeqPlex-8  | BCC | 0.084043 | 21.059965 | 0.453615 | 8.839476 | 1.894575 | 3.171917 |
| SeqPlex-9  | BCC | 0.096959 | 18.022091 | 0.499018 | 7.832595 | 1.81233  | 2.549455 |
| SeqPlex-10 | BCC | 0.088354 | 20.280235 | 0.470398 | 8.570266 | 1.927523 | 3.133729 |
|            |     |          |           |          |          |          |          |
| TELP-1     | ABB | 0.211235 | 6.472151  | 0.802559 | 2.599313 | 1.656032 | 1.524841 |
| TELP-2     | ABB | 0.21915  | 6.800483  | 0.819653 | 2.664391 | 1.694813 | 1.535172 |
| TELP-3     | ABB | 0.227604 | 6.579879  | 0.847087 | 2.615872 | 1.742807 | 1.515468 |
| TELP-4     | ABB | 0.209242 | 6.918703  | 0.7935   | 2.69359  | 1.655803 | 1.53655  |
| TELP-5     | ABB | 0.212497 | 7.090452  | 0.807732 | 2.750311 | 1.703918 | 1.557263 |
| TELP-6     | BBB | 0.152396 | 8.12993   | 0.667222 | 3.321194 | 1.604055 | 1.641565 |
| TELP-7     | BBB | 0.16892  | 7.59806   | 0.70876  | 2.963268 | 1.60524  | 1.560746 |
| TELP-8     | BBB | 0.151395 | 8.269901  | 0.675984 | 3.280001 | 1.63157  | 1.6206   |
| TELP-9     | BBB | 0.159422 | 7.805429  | 0.679768 | 2.998426 | 1.572633 | 1.552943 |
| TELP-10    | BBB | 0.166329 | 7.66254   | 0.702129 | 2.975948 | 1.618162 | 1.550296 |
|            |     |          |           |          |          |          |          |
| ThruPlex-2 | AAB | 0.370049 | 4.929999  | 1.167474 | 2.246477 | 2.129825 | 1.442457 |
| ThruPlex-3 | AAB | 0.36013  | 4.991673  | 1.149517 | 2.255111 | 2.115672 | 1.440855 |
| ThruPlex-4 | AAB | 0.373001 | 4.867506  | 1.183341 | 2.208975 | 2.146692 | 1.42917  |
| ThruPlex-5 | AAB | 0.375977 | 4.843253  | 1.165341 | 2.243934 | 2.136523 | 1.438264 |
| ThruPlex-6 | ABB | 0.24285  | 8.22016   | 1.096535 | 3.145392 | 2.724134 | 1.597851 |
| ThruPlex-7 | AAB | 0.27261  | 6.487333  | 1.091099 | 2.693894 | 2.316952 | 1.500779 |
| ThruPlex-8 | AAB | 0.27136  | 6.62124   | 1.098657 | 2.725343 | 2.359952 | 1.502552 |

|             |     |          |          |          |          |          |          |
|-------------|-----|----------|----------|----------|----------|----------|----------|
| ThruPlex-9  | AAB | 0.273332 | 6.500999 | 1.081632 | 2.723792 | 2.323443 | 1.499245 |
| ThruPlex-10 | BBB | 0.233383 | 8.324311 | 1.068787 | 3.135932 | 2.645676 | 1.606392 |

**Table S2.** NGS-QC indicators.



| <b>Method</b> | <b>Input Amount (ng)</b> | <b>Mean number of peaks called</b> | <b>Mean number of reference peaks overlapped by sample peaks</b> | <b>Mean number of sample peaks not found in reference dataset</b> | <b>Mean sensitivity (% reference peaks detected)</b> | <b>Mean specificity (% method peaks found in reference dataset)</b> |
|---------------|--------------------------|------------------------------------|------------------------------------------------------------------|-------------------------------------------------------------------|------------------------------------------------------|---------------------------------------------------------------------|
| PCR-free      | 100                      | 23,434 ± 274                       | 20,933 ± 0                                                       | 2,501 ± 274                                                       | 100 %                                                | 89 %                                                                |
| Accel-2S      | 1                        | 21,196 ± 340                       | 19,636 ± 162                                                     | 1,561 ± 184                                                       | 94 %                                                 | 93 %                                                                |
| Bowman        | 1                        | 22,421 ± 375                       | 19,595 ± 101                                                     | 2,826 ± 299                                                       | 94 %                                                 | 87 %                                                                |
| SeqPlex       | 1                        | 36,338 ± 1,457                     | 17,345 ± 57                                                      | 18,994 ± 1,482                                                    | 83 %                                                 | 48 %                                                                |
| SMART         | 1                        | 21,014 ± 572                       | 18,638 ± 103                                                     | 2,376 ± 628                                                       | 89 %                                                 | 89 %                                                                |
| TELP          | 1                        | 24,338 ± 688                       | 18,666 ± 144                                                     | 5,672 ± 760                                                       | 89 %                                                 | 77 %                                                                |
| ThruPLEX      | 1                        | 21,708 ± 99                        | 19,677 ± 51                                                      | 2,032 ± 72                                                        | 94 %                                                 | 91 %                                                                |

**Table S3.** Peak calling with 16 M uniquely mapping reads in 1 ng input samples

| <b>Method</b> | <b>Combined total number of peaks (1 ng input)</b> | <b>Combined total number of peaks (0.1 ng input)</b> | <b>Number of 1 ng peaks found in 0.1 ng input</b> | <b>Percent 1 ng peaks detected in 0.1 ng input</b> |
|---------------|----------------------------------------------------|------------------------------------------------------|---------------------------------------------------|----------------------------------------------------|
| Accel-2S      | 20843                                              | 20962                                                | 19563                                             | 93,9                                               |
| Bowman        | 21821                                              | 22705                                                | 20287                                             | 93,0                                               |
| SeqPlex       | 33119                                              | 97655                                                | 26968                                             | 81,4                                               |
| SMART         | 20750                                              | 23605                                                | 19199                                             | 92,5                                               |
| TELP          | 22799                                              | 21907                                                | 20502                                             | 89,9                                               |
| ThruPLEX      | 20777                                              | 20473                                                | 19273                                             | 92,8                                               |

**Table S4.** Overlap of peaks called for each method at 1 ng and 0.1 ng input.

| Method   | Input Amount (ng) | Mean number of peaks called | Mean number of ENCODE peaks overlapped by sample peaks | Mean number of sample peaks not found in ENCODE dataset | Mean sensitivity (% ENCODE peaks detected) | Mean specificity (% method peaks found in ENCODE dataset) |
|----------|-------------------|-----------------------------|--------------------------------------------------------|---------------------------------------------------------|--------------------------------------------|-----------------------------------------------------------|
| ENCODE   | unknown           | 24680 ± 1848                | 21291 ± 0                                              | 3389 ± 1848                                             | 100 %                                      | 87 %                                                      |
| Accel 2S | 1                 | 18190 ± 123                 | 14432 ± 32                                             | 3758 ± 102                                              | 68 %                                       | 79 %                                                      |
|          | 0.1               | 18179 ± 124                 | 14387 ± 68                                             | 3793 ± 78                                               | 68 %                                       | 79 %                                                      |
| Bowman   | 1                 | 19082 ± 334                 | 14509 ± 47                                             | 4574 ± 294                                              | 68 %                                       | 76 %                                                      |
|          | 0.1               | 18986 ± 365                 | 14471 ± 65                                             | 4515 ± 350                                              | 68 %                                       | 76 %                                                      |
| SeqPlex  | 1                 | 21382 ± 265                 | 12700 ± 75                                             | 8682 ± 254                                              | 60 %                                       | 59 %                                                      |
|          | 0.1               | 35867 ± 3861                | 13213 ± 75                                             | 22654 ± 3866                                            | 62 %                                       | 37 %                                                      |
| SMART    | 1                 | 17906 ± 765                 | 14000 ± 80                                             | 3906 ± 781                                              | 66 %                                       | 78 %                                                      |
|          | 0.1               | 19893 ± 3196                | 13926 ± 77                                             | 5967 ± 3237                                             | 65 %                                       | 71 %                                                      |
| TELP     | 1                 | 20529 ± 1592                | 13926 ± 84                                             | 6603 ± 1656                                             | 65 %                                       | 68 %                                                      |
|          | 0.1               | 20149 ± 1619                | 13725 ± 93                                             | 6424 ± 1659                                             | 64 %                                       | 68 %                                                      |
| ThruPLEX | 1                 | 18377 ± 152                 | 14521 ± 43                                             | 3857 ± 142                                              | 68 %                                       | 79 %                                                      |
|          | 0.1               | 18015 ± 178                 | 14224 ± 56                                             | 3791 ± 209                                              | 67 %                                       | 79 %                                                      |

**Table S5.** Peak calling with 5.5 M uniquely mapping reads, compared to an ENCODE H3K4me3 dataset. ENCODE dataset was compiled from two replicate samples.

| <b>Group Name</b> | <b>Sample</b> | <b>Reads</b> | <b>Reads within peaks</b> | <b>FRiP</b> | <b>Mean FRiP</b> | <b>SD FRiP</b> |
|-------------------|---------------|--------------|---------------------------|-------------|------------------|----------------|
| Accel 1ng         | Accel-2S-1    | 5500001      | 3474212                   | 0.63        | 0.65             | 0.01           |
|                   | Accel-2S-2    | 5499796      | 3507174                   | 0.64        |                  |                |
|                   | Accel-2S-3    | 5499538      | 3658319                   | 0.67        |                  |                |
|                   | Accel-2S-4    | 5499584      | 3615720                   | 0.66        |                  |                |
|                   | Accel-2S-5    | 5499875      | 3543626                   | 0.64        |                  |                |
| Accel 100pg       | Accel-2S-6    | 5498777      | 3670663                   | 0.67        | 0.66             | 0.01           |
|                   | Accel-2S-7    | 5498221      | 3720480                   | 0.68        |                  |                |
|                   | Accel-2S-8    | 5499678      | 3624255                   | 0.66        |                  |                |
|                   | Accel-2S-9    | 5499463      | 3642985                   | 0.66        |                  |                |
|                   | Accel-2S-10   | 5499941      | 3590177                   | 0.65        |                  |                |
| Bowman 1ng        | Bowman-1      | 5500101      | 2779907                   | 0.51        | 0.52             | 0.01           |
|                   | Bowman-2      | 5499945      | 2854996                   | 0.52        |                  |                |
|                   | Bowman-4      | 5499609      | 2886667                   | 0.52        |                  |                |
|                   | Bowman-5      | 5499697      | 2947393                   | 0.54        |                  |                |
| Bowman 100pg      | Bowman-6      | 5499698      | 3395187                   | 0.62        | 0.59             | 0.02           |
|                   | Bowman-7      | 5501557      | 3211747                   | 0.58        |                  |                |
|                   | Bowman-8      | 5500826      | 3287364                   | 0.60        |                  |                |
|                   | Bowman-9      | 5499726      | 3264258                   | 0.59        |                  |                |
|                   | Bowman-10     | 5502090      | 3146658                   | 0.57        |                  |                |
| PCRfree (100 ng)  | PCRfree-1     | 5499785      | 2645771                   | 0.48        | 0.47             | 0.01           |
|                   | PCRfree-2     | 5499066      | 2642428                   | 0.48        |                  |                |
|                   | PCRfree-3     | 5499117      | 2538591                   | 0.46        |                  |                |
| SeqPlex 1ng       | SeqPlex-1     | 5499807      | 1370803                   | 0.25        | 0.24             | 0.01           |
|                   | SeqPlex-2     | 5498025      | 1366011                   | 0.25        |                  |                |
|                   | SeqPlex-3     | 5498106      | 1327347                   | 0.24        |                  |                |

|               |            |         |         |      |      |      |
|---------------|------------|---------|---------|------|------|------|
|               | SeqPlex-4  | 5499763 | 1395833 | 0.25 |      |      |
|               | SeqPlex-5  | 5500109 | 1259644 | 0.23 |      |      |
| SeqPlex 100pg | SeqPlex-6  | 5501256 | 1760888 | 0.32 | 0.31 | 0.01 |
|               | SeqPlex-7  | 5501161 | 1664943 | 0.30 |      |      |
|               | SeqPlex-8  | 5502198 | 1637192 | 0.30 |      |      |
|               | SeqPlex-9  | 5501616 | 1710224 | 0.31 |      |      |
|               | SeqPlex-10 | 5501064 | 1797914 | 0.33 |      |      |
| SMART 1ng     | SMART-1    | 5499821 | 2554346 | 0.46 | 0.46 | 0.01 |
|               | SMART-2    | 5499788 | 2443787 | 0.44 |      |      |
|               | SMART-3    | 5500184 | 2525034 | 0.46 |      |      |
|               | SMART-4    | 5499862 | 2480233 | 0.45 |      |      |
|               | SMART-5    | 5499917 | 2549131 | 0.46 |      |      |
| SMART 100pg   | SMART-6    | 5500701 | 2433387 | 0.44 | 0.49 | 0.03 |
|               | SMART-7    | 5501756 | 2737172 | 0.50 |      |      |
|               | SMART-8    | 5501890 | 2788555 | 0.51 |      |      |
|               | SMART-9    | 5501744 | 2701959 | 0.49 |      |      |
|               | SMART-10   | 5500317 | 2818748 | 0.51 |      |      |
| TELP 1ng      | TELP-1     | 5497335 | 2146561 | 0.39 | 0.40 | 0.02 |
|               | TELP-2     | 5497312 | 2073288 | 0.38 |      |      |
|               | TELP-3     | 5500008 | 2388140 | 0.43 |      |      |
|               | TELP-4     | 5499853 | 2138841 | 0.39 |      |      |
|               | TELP-5     | 5499061 | 2142693 | 0.39 |      |      |
| TELP 100pg    | TELP-6     | 5500054 | 2419524 | 0.44 | 0.43 | 0.01 |
|               | TELP-7     | 5499688 | 2355129 | 0.43 |      |      |
|               | TELP-8     | 5500083 | 2391592 | 0.43 |      |      |
|               | TELP-9     | 5498872 | 2387873 | 0.43 |      |      |
|               | TELP-10    | 5497986 | 2344310 | 0.43 |      |      |

|                |             |         |         |      |      |      |
|----------------|-------------|---------|---------|------|------|------|
| ThruPLEX 1ng   | ThruPLEX-2  | 5500170 | 3357889 | 0.61 | 0.63 | 0.01 |
|                | ThruPLEX-3  | 5499984 | 3358186 | 0.61 |      |      |
|                | ThruPLEX-4  | 5501002 | 3409441 | 0.62 |      |      |
|                | ThruPLEX-5  | 5499905 | 3346614 | 0.61 |      |      |
| ThruPLEX 100pg | ThruPLEX-6  | 5500296 | 3933336 | 0.72 | 0.68 | 0.02 |
|                | ThruPLEX-7  | 5502315 | 3702538 | 0.67 |      |      |
|                | ThruPLEX-8  | 5502098 | 3728176 | 0.68 |      |      |
|                | ThruPLEX-9  | 5501948 | 3683665 | 0.67 |      |      |
|                | ThruPLEX-10 | 5500581 | 3866571 | 0.70 |      |      |

**Table S6.** Fraction of reads in peaks (FRiP).
